# Supplementary material for: Genome-Wide Expression Patterns and the Genetic Architecture of a Fundamental Social Trait
Source: PLOS journal article supplement (doi:10.1371/journal.pgen.1000127), 2008-07-17
Supplement: S3 (10.1371/journal.pgen.1000127.s003) [file journal.pgen.1000127.s003]

**Supplementary Table S2. List of gene categories significantly overrepresented among differentially expressed genes in the genotype and social form comparisons**

| Category†               | Genotype comparison |                           | Social form comparison |                           | Genes on array |
|-------------------------|---------------------|---------------------------|------------------------|---------------------------|----------------|
|                         | Number of genes     | Fold enrichment           | Number of genes        | Fold enrichment           |                |
| allergen                | 2                   | <b>35.8</b><br>p < 0.0014 | 1                      |                           | 17             |
| mitochondrial           | 1                   |                           | 8                      | <b>2.3</b><br>p < 0.022   | 450            |
| nucleic acid metabolism | 1                   |                           | 2                      | 0.4<br>p < 0.98           | 737            |
| odorant binding         | 3                   | <b>38.0</b><br>p < 6.4e-5 | 0                      |                           | 24             |
| prefoldin complex       | 0                   |                           | 3                      | <b>65.2</b><br>p < 8.6e-6 | 6              |
| transferase             | 0                   |                           | 2                      | 0.6                       | 444            |
| transposon              | 2                   | <b>6.1</b><br>p < 0.042   | 0                      |                           | 99             |
| virus                   | 0                   |                           | 6                      | <b>27.9</b><br>p < 5.7e-8 | 28             |
| TOTAL                   | 39                  |                           | 91                     |                           | 11864          |

Gene groups with 0 or 1 gene were not analyzed.

† Gene category as described in the supplementary text S1.
